# Supplementary material
Source: MDPI journal article supplement (https://www.mdpi.com/2072-4292/7/12/15814)
Supplement: s1 [file s1]

Supplementary Materials: Precise Positioning of BDS, BDS/GPS: Implications for Tsunami Early Warning in South China Sea. *Remote Sens.* 2015, *7*, pagenumber

Kejie Chen, Natalia Zamora, Andrey Babeyko, Xingxing Li and Maorong Ge

Tables S1 and S2 show the wave heights at position of interest (POI) corresponding bars to the in Figures 5 and 7.

**Table S1.** Maximum wave heights and estimated time arrival at POIs for the Mw = 8 case study.

| **POI** | **ETA Fw Mw 8 (min)** | **WH Fw Mw 8 (m)** | **ETA BDS Mw 8 (min)** | **WH BDS Mw 8 (m)** | **ETA BDS-GPS Mw 8 (min)** | **WH BDS-GPS Mw 8 (m)** |
| --- | --- | --- | --- | --- | --- | --- |
| COL | 12.97 | 1.04 | 10.70 | 0.90 | 10.47 | 0.90 |
| Ilocos | 0.05 | 6.51 | 0.05 | 4.82 | 0.05 | 4.73 |
| ING | 15.40 | 1.64 | 13.57 | 1.59 | 13.33 | 1.53 |
| Laoag | 0.05 | 6.76 | 0.05 | 7.24 | 0.05 | 7.21 |
| NLZ | 0.05 | 3.33 | 2.33 | 2.40 | 2.23 | 2.20 |
| Pingtung | 41.30 | 0.97 | 37.10 | 0.92 | 37.23 | 0.91 |
| SCS1 | 188.40 | 1.06 | 187.33 | 1.16 | 187.23 | 1.15 |
| SCS10 | 52.23 | 5.55 | 50.90 | 4.92 | 50.87 | 4.88 |
| SCS2 | 167.57 | 2.21 | 166.03 | 2.41 | 166.07 | 2.34 |
| SCS3 | 167.57 | 2.39 | 166.03 | 2.47 | 166.07 | 2.43 |
| SCS4 | 176.67 | 1.48 | 175.37 | 1.58 | 175.40 | 1.54 |
| SCS5 | 74.13 | 0.71 | 68.80 | 0.75 | 68.90 | 0.72 |
| SCS6 | 176.67 | 1.48 | 175.37 | 1.58 | 175.40 | 1.54 |
| SCS7 | 30.47 | 1.88 | 24.97 | 2.01 | 25.07 | 1.95 |
| SFD | 17.20 | 1.28 | 16.47 | 1.34 | 16.30 | 1.31 |
| Sh2 | 176.67 | 1.48 | 175.37 | 1.58 | 175.40 | 1.54 |
| Shantou | 167.57 | 2.19 | 166.03 | 2.24 | 166.07 | 2.19 |
| Taitung | 37.80 | 1.47 | 32.40 | 1.18 | 32.53 | 1.15 |
| XiachuanDao | 202.50 | 0.93 | 200.50 | 0.97 | 200.80 | 0.94 |

ETA: Estimated Time Arrival; WH: Wave Height at POI; Fw: Forward model.

**Table S2.** Maximum wave heights and estimated time arrival at POIs for the Mw = 7.5 case study.

| **POI** | **ETA Fw Mw 7.5 (min)** | **WH Fw Mw 7.5 (m)** | **ETA BDS Mw 7.5 (min)** | **WH BDS Mw 7.5 (m)** | **ETA BDS-GPS Mw 7.5 (min)** | **WH BDS-GPS Mw 7.5 (m)** |
| --- | --- | --- | --- | --- | --- | --- |
| COL | 13.13 | 0.19 | 13.43 | 0.17 | 13.33 | 0.19 |
| HongKong | 51.23 | 0.54 | 50.10 | 0.43 | 45.13 | 0.48 |
| Ilocos | 1.00 | 1.16 | 1.00 | 0.60 | 1.00 | 0.94 |
| ING | 15.93 | 0.29 | 16.20 | 0.24 | 16.40 | 0.40 |
| Laoag | 0.00 | 1.20 | 0.00 | 1.13 | 0.00 | 1.40 |
| NLZ | 0.00 | 0.57 | 4.33 | 0.49 | 3.97 | 0.54 |
| Pingtung | 45.47 | 0.17 | 41.17 | 0.14 | 39.23 | 0.17 |
| SCC7 | 31.53 | 0.34 | 30.60 | 0.30 | 28.00 | 0.34 |
| SCS1 | 189.90 | 0.19 | 188.67 | 0.19 | 188.50 | 0.22 |
| SCS10 | 53.17 | 0.98 | 52.00 | 0.86 | 47.33 | 0.94 |
| SCS2 | 169.10 | 0.39 | 167.77 | 0.42 | 165.93 | 0.47 |
| SCS3 | 169.10 | 0.42 | 167.77 | 0.36 | 165.93 | 0.46 |
| SCS4 | 178.70 | 0.26 | 177.50 | 0.26 | 176.93 | 0.32 |
| SCS5 | 77.47 | 0.12 | 76.80 | 0.13 | 73.83 | 0.17 |
| SCS6 | 178.70 | 0.26 | 177.50 | 0.26 | 176.93 | 0.32 |
| SFD | 18.17 | 0.23 | 18.50 | 0.24 | 19.13 | 0.30 |
| Sh2 | 178.70 | 0.26 | 177.50 | 0.26 | 176.93 | 0.32 |
| Shantou | 169.10 | 0.38 | 167.77 | 0.33 | 165.93 | 0.42 |
| Taitung | 41.13 | 0.25 | 40.07 | 0.23 | 37.33 | 0.20 |
| XiachuanDao | 204.30 | 0.16 | 202.90 | 0.16 | 203.20 | 0.19 |

ETA: Estimated Time Arrival; WH: Wave Height at POI; Fw: Forward model.

© 2015 by the authors; licensee MDPI, Basel, Switzerland. This article is an open access article distributed under the terms and conditions of the Creative Commons by Attribution (CC-BY) license (http://creativecommons.org/licenses/by/4.0/).
